# Supplementary material
Source: JCI journal article supplement (doi:10.1172/jci194677)
Supplement: sd1 [file 1]

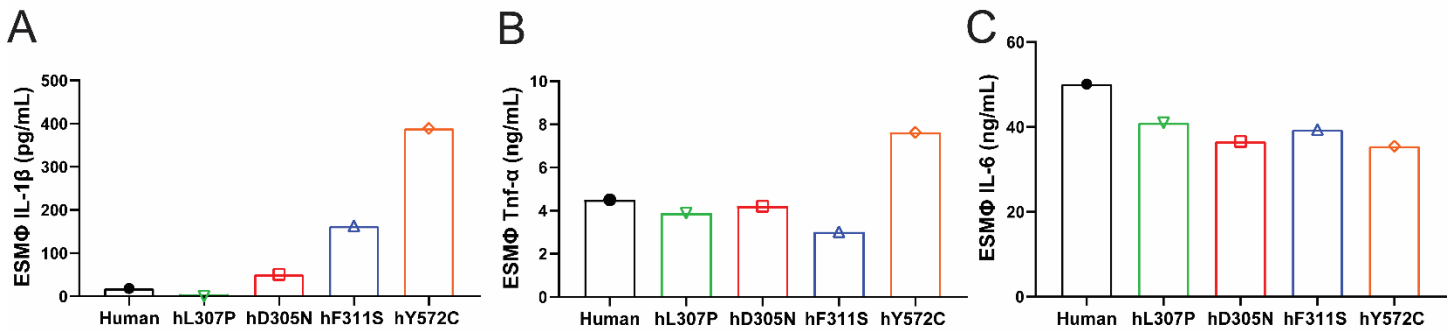

**Supplemental Figure 1. Phenotypic evaluation of ES cell–derived macrophages humanized for the common *NLRP3* allele or disease-associated variants.**

The endogenous mouse *Nlrp3* locus in an ES cell line was deleted and reconstituted with one of five DNA segments, each differing only in the human *NLRP3* allele they encode. These alleles include the common *NLRP3* variant and mutations identified in CAPS patients spanning a range of clinical severities. Equivalent numbers of ES cells of each genotype were differentiated into macrophage-like cells using a published protocol (1). Briefly, ES cells were cultured on 0.1% gelatin–treated dishes in DMEM supplemented with 15% FCS, 10 ng/mL LIF, and  $1.5 \times 10^{-4}$  M monothioglycerol (MTG). For embryoid body formation, cells were trypsinized and plated in bacterial-grade Petri dishes at  $7.5 \times 10^3$  cells/mL in IMDM containing 15% FCS, 2 mM glutamine, 300  $\mu$ g/mL transferrin, 50  $\mu$ g/mL ascorbic acid, 5% PFHM-II, and  $4 \times 10^{-4}$  M MTG. Embryoid bodies were harvested on day 6, washed once with IMDM + 10% FCS, and cultured at  $1 \times 10^6$  cells/mL in IMDM supplemented with 15% L929 conditioned medium (CM), 1 ng/mL IL-3, and  $1.5 \times 10^{-4}$  M MTG. After 48 hours, non-adherent macrophage precursors were collected and cultured in IMDM with 15% L929 CM, 10% FCS, and  $1.5 \times 10^{-4}$  M MTG. Adherent macrophages developed over the following 2–3 days and were used after day 7. Cytokine release following 24-hour LPS exposure was quantified. IL-1 $\beta$  release varied by *NLRP3* genotype in a pattern that reflects the clinical severity observed in humans (A). Cells expressing the L307P allele showed minimal IL-1 $\beta$  secretion, whereas F311S- and Y523C-expressing cells exhibited markedly elevated release, and D305N-expressing cells displayed intermediate levels. In contrast, TNF- $\alpha$  (B) and IL-6 (C) levels measured from the same supernatants did not correlate with disease severity. Although this was a single pilot experiment containing all five alleles, the striking allele-specific differences in IL-1 $\beta$  release provided an important proof-of-concept. These ES cell–derived macrophage data previewed the relative inflammatory potential of each *NLRP3* variant and supported the rationale for generating the corresponding humanized mouse lines. Including this supplemental figure documents the basis for that decision and highlights the broader value of ES cell–based assays for anticipating *in vivo* phenotypes—an approach that will be equally important for the future generation and evaluation of additional *NLRP3* variant mouse lines.

1. Keller GM, Webb S, and Kennedy M. Hematopoietic Development of ES Cells in Culture. *Methods Mol Med.* 2002;63:209–30.

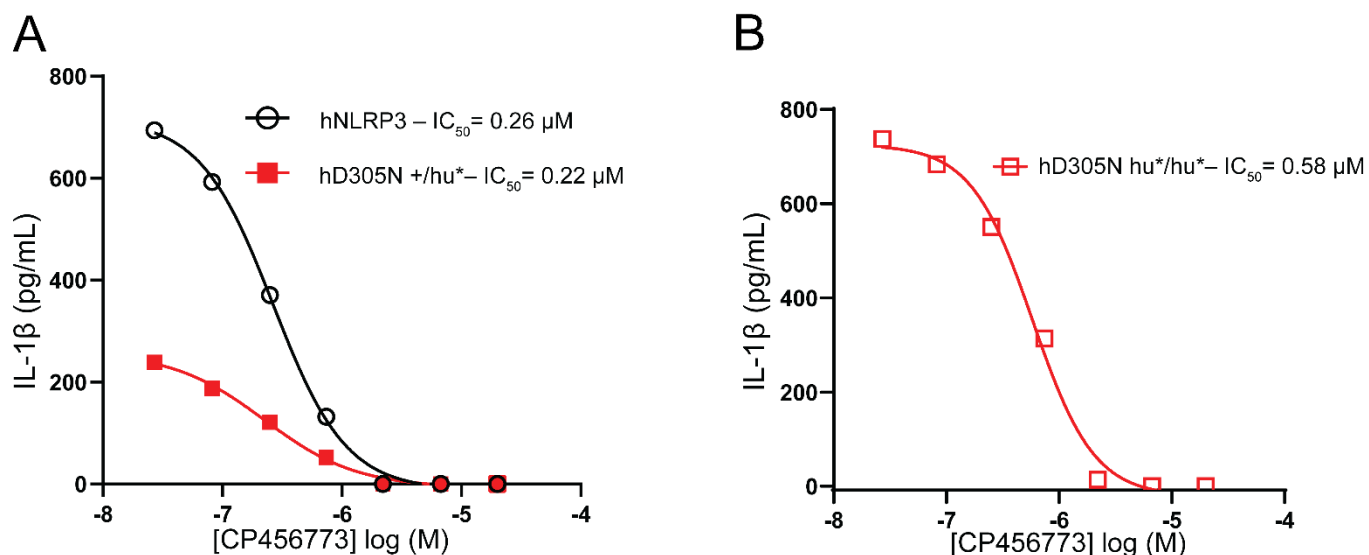

**Supplemental Figure 2. Comparison of the sensitivity of blood from heterozygous and homozygous D305N CAPS mice to CP-456,773 inhibition of IL-1 $\beta$  release.** Blood was collected from mice of the indicated genotypes and exposed to LPS alone or LPS followed by ATP at 37 °C. **(A)** Blood from mice homozygous for the common *NLRP3* allele (hNLRP3) released IL-1 $\beta$  after LPS/ATP stimulation, and this release was inhibited by CP-456,773 in a concentration-dependent manner. Blood from mice heterozygous **(A)** or homozygous **(B)** for the D305N allele released IL-1 $\beta$  following LPS exposure alone, although the magnitude differed, with higher levels observed in homozygous cultures as expected. IL-1 $\beta$  release from both heterozygous and homozygous D305N blood was inhibited by CP-456,773. Despite the lower total IL-1 $\beta$  release in the heterozygous animals, the observed  $IC_{50}$  values were relatively similar across genotypes. The mean  $IC_{50}$  for nine independent assays using blood from hNLRP3 mice stimulated with LPS followed by ATP was  $0.49 \pm 0.05 \mu\text{M}$ . In comparison, the mean  $IC_{50}$  for mice homozygous for the D305N allele, based on four independent experiments, was  $0.79 \pm 0.10 \mu\text{M}$ . The mean  $IC_{50}$  for three independent experiments using blood from mice heterozygous for the D305N allele was  $0.21 \pm 0.003 \mu\text{M}$ .

| hNLRP3 hu/hu          | D305N hu/hu           | D305N+/hu             |  |
|-----------------------|-----------------------|-----------------------|--|
| $IC_{50} \mu\text{M}$ | $IC_{50} \mu\text{M}$ | $IC_{50} \mu\text{M}$ |  |
| 0.49                  | 0.87                  | 0.21                  |  |
| 0.42                  | 0.68                  | 0.22                  |  |
| 0.66                  | 1.04                  | 0.21                  |  |
| 0.44                  | 0.58                  |                       |  |
| 0.66                  |                       |                       |  |
| 0.62                  |                       |                       |  |
| 0.61                  |                       |                       |  |
| 0.26                  |                       |                       |  |
| 0.295                 |                       |                       |  |
| Mean : 0.49           | 0.79                  | 0.21                  |  |
| SEM 0.05              | SEM 0.10              | SEM 0.003             |  |

**Table 1.** Main clinical features in patients with cryopyrinopathies (CAPS)

| <b>Characteristic</b>                             | <b>FCAS</b>        | <b>MWS</b>         | <b>NOMID/ CINCA</b>        |
|---------------------------------------------------|--------------------|--------------------|----------------------------|
| <b>Inheritance</b>                                | Autosomal dominant | Autosomal dominant | De Novo Autosomal dominant |
| <b>Age of onset</b>                               | Birth              | Infancy            | Birth                      |
| <b>Fever</b>                                      | +                  | +                  | +                          |
| <b>Cutaneous rash</b>                             | Cold-induced       | +                  | +                          |
| <b>CNS Inflammation</b>                           | Headache           | +                  | +                          |
| <b>Arthritis/bony overgrowth</b>                  | –                  | –/+                | +                          |
| <b>Growth retardation</b>                         | –                  | – /+               | +                          |
| <b>Frontal bossing, saddleback nose, clubbing</b> | –                  | –                  | +                          |
| <b>Gene mutations</b>                             | p.Leu305Pro        | p.Asp305Asn        | p.Tyr572Cys<br>p.Phe311Ser |

FCAS, familial cold autoinflammatory syndrome; MWS, Muckle-Wells; NOMID/CINCA, Neonatal onset multisystem Inflammatory disease/ chronic infantile neurological, cutaneous and articular syndrome.

# TABLE 2

## Figure 1B

Spleen Wt (Tukey-Kramer test)

|        | hNLRP3 | hL307P | hD305N | hF311S | hY572C |
|--------|--------|--------|--------|--------|--------|
| hNLRP3 |        | ns     | ns     | ns     | **     |
| hL307P | ns     |        | ns     | ns     | *      |
| hD305N | ns     | ns     |        | ns     | *      |
| hF311S | ns     | ns     | ns     |        | ns     |
| hY572C | **     | *      | *      | ns     |        |

## Figure 1D

IL-1Ra (Tukey-Kramer test)

|        | hNLRP3 | hL307P | hD305N | hF311S | hY572C |
|--------|--------|--------|--------|--------|--------|
| hNLRP3 |        | ns     | ns     | **     | ****   |
| hL307P | ns     |        | ns     | **     | ****   |
| hD305N | ns     | ns     |        | ns     | ****   |
| hF311S | **     | **     | ns     |        | *      |
| hY572C | ****   | ****   | ****   | *      |        |

## Figure 1E

SAP (Tukey-Kramer test)

|        | hNLRP3 | hL307P | hD305N | hF311S | hY572C |
|--------|--------|--------|--------|--------|--------|
| hNLRP3 |        | *      | ns     | ****   | ****   |
| hL307P | *      |        | ns     | ns     | ***    |
| hD305N | ns     | ns     |        | **     | ****   |
| hF311S | ****   | ns     | **     |        | ns     |
| hY572C | ****   | ***    | ****   | ns     |        |

## Figure 1F

IL-1 $\beta$  (Tukey-Kramer test)

|        | hNLRP3 | hL307P | hD305N | hF311S | hY572C |
|--------|--------|--------|--------|--------|--------|
| hNLRP3 |        | ns     | *      | **     | **     |
| hL307P | ns     |        | ns     | *      | *      |
| hD305N | *      | ns     |        | ns     | ns     |
| hF311S | **     | *      | ns     |        | ns     |
| hY572C | **     | *      | ns     | ns     |        |

## Figure 1G

IL-18 (Tukey-Kramer test)

|        | hNLRP3 | hL307P | hD305N | hF311S | hY572C |
|--------|--------|--------|--------|--------|--------|
| hNLRP3 |        | ns     | ns     | **     | ns     |
| hL307P | ns     |        | ns     | **     | ns     |
| hD305N | ns     | ns     |        | ns     | ns     |
| hF311S | **     | **     | ns     |        | ns     |
| hY572C | ns     | ns     | ns     | ns     |        |

## Figure 1I

IL-6 (Tukey-Kramer test)

|        | hNLRP3 | hL307P | hD305N | hF311S | hY572C |
|--------|--------|--------|--------|--------|--------|
| hNLRP3 |        | ns     | ns     | **     | ***    |
| hL307P | ns     |        | ns     | *      | **     |
| hD305N | ns     | ns     |        | ns     | ns     |
| hF311S | **     | *      | ns     |        | ns     |
| hY572C | ***    | **     | ns     | ns     |        |

# TABLE 3

## Figure 2C

### PLF-IL-1 $\beta$ (Tukey-Kramer test)

|        | hNLRP3 | hL307P | hD305N | hF311S | hY572C |
|--------|--------|--------|--------|--------|--------|
| hNLRP3 |        | ns     | ns     | ***    | ****   |
| hL307P | ns     |        | ns     | ***    | ****   |
| hD305N | ns     | ns     |        | *      | ****   |
| hF311S | ***    | ***    | *      |        | **     |
| hY572C | ****   | ****   | ****   | **     |        |

## Figure 2E

### PGE<sub>2</sub> (Tukey-Kramer test)

|        | hNLRP3 | hL307P | hD305N | hF311S | hY572C |
|--------|--------|--------|--------|--------|--------|
| hNLRP3 |        | ns     | ns     | **     | ****   |
| hL307P | ns     |        | ns     | **     | ****   |
| hD305N | ns     | ns     |        | **     | ****   |
| hF311S | **     | **     | **     |        | ****   |
| hY572C | ****   | ****   | ****   | ****   |        |

## Figure 2H

### LDH release (Tukey-Kramer test)

|        | hNLRP3 | hL307P | hD305N | hF311S | hY572C |
|--------|--------|--------|--------|--------|--------|
| hNLRP3 |        | ns     | ns     | *      | **     |
| hL307P | ns     |        | ns     | ns     | *      |
| hD305N | ns     | ns     |        | ns     | ns     |
| hF311S | *      | ns     | ns     |        | ns     |
| hY572C | **     | *      | ns     | ns     |        |

# TABLE 4

## Figure 3G - CBC - WBC

### CBC-WBC (Tukey-Kramer test)

|        | hNLRP3 | hL307P | hD305N | hF311S | hY572C |
|--------|--------|--------|--------|--------|--------|
| hNLRP3 |        | N/A    | ns     | ns     | ***    |
| hL307P | N/A    |        | N/A    | N/A    | N/A    |
| hD305N | ns     | N/A    |        | ns     |        |
| hF311S | ns     | N/A    | ns     |        | ***    |
| hY572C | ***    | N/A    | ***    | **     |        |

N/A-evaluation not available

## Figure 3G - CBC - neutrophils

### CBC-neutrophils (Tukey-Kramer test)

|        | hNLRP3 | hL307P | hD305N | hF311S | hY572C |
|--------|--------|--------|--------|--------|--------|
| hNLRP3 |        | N/A    | ns     | ns     | ***    |
| hL307P | N/A    |        | N/A    | N/A    | N/A    |
| hD305N | ns     | N/A    |        | ns     | ***    |
| hF311S | ns     | N/A    | ns     |        | **     |
| hY572C | ***    | N/A    | ***    | **     |        |

N/A-evaluation not available

## Figure 3G - CBC - lymphocytes

### CBC-lymphocytes (Tukey-Kramer test)

|        | hNLRP3 | hL307P | hD305N | hF311S | hY572C |
|--------|--------|--------|--------|--------|--------|
| hNLRP3 |        | N/A    | ns     | ns     | **     |
| hL307P | N/A    |        | N/A    | N/A    | N/A    |
| hD305N | ns     | N/A    |        | ns     | *      |
| hF311S | ns     | N/A    | ns     |        | *      |
| hY572C | **     | N/A    | *      | *      |        |

N/A-evaluation not available

## Figure 3G - CBC - monocytes

### CBC Monocytes (Tukey-Kramer test)

|        | hNLRP3 | hL307P | hD305N | hF311S | hY572C |
|--------|--------|--------|--------|--------|--------|
| hNLRP3 |        | N/A    | ns     | ns     | ****   |
| hL307P | N/A    |        | N/A    | N/A    | N/A    |
| hD305N | ns     | N/A    |        | ns     | ****   |
| hF311S | ns     | N/A    | ns     |        | ****   |
| hY572C | ****   | N/A    | ****   | ****   |        |

N/A-evaluation not available

## Comparison of CBC values between hNLRP3 and CAPS genotypes

|                    |               | Unpaired Welch's t-test |  |  | Dunnett's |  |  |
|--------------------|---------------|-------------------------|--|--|-----------|--|--|
| <b>Neutrophils</b> | NLRP3 - D305N | ns                      |  |  | ns        |  |  |
|                    | NLRP3 - F311S | *                       |  |  | ns        |  |  |
|                    | NLRP3 - Y572C | *                       |  |  | ***       |  |  |
|                    |               | Unpaired Welch's t-test |  |  | Dunnett's |  |  |
| <b>Monocytes</b>   | NLRP3 - D305N | **                      |  |  | ns        |  |  |
|                    | NLRP3 - F311S | ***                     |  |  | ns        |  |  |
|                    | NLRP3 - Y572C | **                      |  |  | ****      |  |  |
|                    |               | Unpaired Welch's t-test |  |  | Dunnett's |  |  |
| <b>Lymphocytes</b> | NLRP3 - D305N | ns                      |  |  | ns        |  |  |
|                    | NLRP3 - F311S | *                       |  |  | ns        |  |  |
|                    | NLRP3 - Y572C | ns                      |  |  | **        |  |  |

# TABLE 5

## Figure 4M

Caspase activity (Tukey-Kramer test)

|                         | hNLRP3 | Casp1/11 <sup>-/-</sup> | hD305N | hF311S | hY572C | hNLRP3-ATP |
|-------------------------|--------|-------------------------|--------|--------|--------|------------|
| hNLRP3                  |        | ns                      | ns     | ****   | ****   | ns         |
| Casp1/11 <sup>-/-</sup> | ns     |                         | ns     | ****   | ****   | ns         |
| hD305N                  | ns     | ns                      |        | **     | ****   | ns         |
| hF311S                  | ****   | ****                    | **     |        | ****   | ****       |
| hY572C                  | ****   | ****                    | ****   | ****   |        | ****       |
| hNLRP3-ATP              | ns     | ns                      | ns     | ****   | ****   |            |

## Figure 4N

IL-1 $\beta$  (Tukey-Kramer test)

|                         | hNLRP3 | Casp1/11 <sup>-/-</sup> | hD305N | hF311S | hY572C | hNLRP3-ATP |
|-------------------------|--------|-------------------------|--------|--------|--------|------------|
| hNLRP3                  |        | ns                      | **     | ****   | ****   | ****       |
| Casp1/11 <sup>-/-</sup> | ns     |                         | **     | ***    | ****   | ****       |
| hD305N                  | **     | **                      |        | ns     | **     | ***        |
| hF311S                  | ****   | ***                     | ns     |        | ns     | *          |
| hY572C                  | ****   | ****                    | **     | ns     |        | ns         |
| hNLRP3-ATP              | ****   | ****                    | ***    | *      | ns     |            |

# TABLE 6

## Figure 5C

### Total CNS immune cells (Tukey-Kramer test)

|        | hNLRP3 | hL307P | hD305N | hF311S | hY572C |
|--------|--------|--------|--------|--------|--------|
| hNLRP3 |        | ns     | ns     | **     | ***    |
| hL307P | ns     |        | ns     | *      | **     |
| hD305N | ns     | ns     |        | ns     | *      |
| hF311S | **     | *      | ns     |        | ns     |
| hY572C | ***    | **     | *      | ns     |        |

### Total CNS immune cells (Welch t-test)

|        | hNLRP3 | hL307P | hD305N | hF311S | hY572C |
|--------|--------|--------|--------|--------|--------|
| hNLRP3 |        | ns     | **     | **     | **     |
| hL307P | ns     |        | **     | ***    | *      |
| hD305N | **     | **     |        | ns     | ns     |
| hF311S | **     | ***    | ns     |        | ns     |
| hY572C | **     | *      | ns     | ns     |        |

**Table 7****Reagents, Kits, Antibodies, Equipment, and Software Used in This Study**

| <b>Category</b>                         | <b>Reagent / Item</b>                    | <b>Company</b>                     | <b>Catalog Number</b> | <b>Notes</b>                                    |
|-----------------------------------------|------------------------------------------|------------------------------------|-----------------------|-------------------------------------------------|
| <b>Animal, Animal Housing</b>           | Ventilated cages (Green Line GM500)      | Tecniplast                         | GM500                 | Individually ventilated cages                   |
|                                         | LabDiet PICOLAB Select 5V5R (irradiated) | PMI Nutrition International        |                       | Mouse diet                                      |
|                                         | Nestlets                                 | Ancare                             |                       | Cage enrichment                                 |
|                                         | “Mouse house” shelter                    | Tecniplast                         |                       | Red-opaque shelter in each cage                 |
|                                         | Bed O Cob ¼”                             | The Andersons                      |                       | Bedding                                         |
| Vivarium Temperature                    | 71 ° F / 22 ° C                          |                                    |                       |                                                 |
| Mice                                    | 129S6                                    | 129S6/SvEvTac, Taconic Bioscience  |                       | Humanized mice are co-isogenic with this strain |
| <b>Chemicals &amp; General Reagents</b> |                                          |                                    |                       |                                                 |
|                                         | LPS (E. coli 55:B5)                      | Sigma-Aldrich                      | L4005                 | In vivo and vivo studies                        |
|                                         | Heparin 1000U/ml                         | Sargent Pharmaceuticals            | NCD25021-400-10       | Blood collection                                |
|                                         | CP-456,773                               | Sigma-Aldrich                      | PZ0280                | NLRP3 inhibitor                                 |
|                                         | TRI reagent                              | Molecular Research Center          | TR118                 | RNA isolation                                   |
|                                         | ATP                                      | Sigma-Aldrich                      | A3377                 |                                                 |
|                                         | Percoll (isotonic)                       | Sigma-Aldrich                      | P1644                 | Density gradient                                |
|                                         | TRI reagent                              | Molecular Research Center          | TR118                 | RNA isolation                                   |
| <b>Cell Isolation/Culture</b>           |                                          |                                    |                       |                                                 |
|                                         | Fetal Bovine Serum                       | VWR                                | 97068–085             |                                                 |
|                                         | HEPES                                    | Corning                            | 25-060-CI             |                                                 |
|                                         | βME                                      | Sigma-Aldrich                      | M3148                 |                                                 |
|                                         | L glutamine                              | Gibco (ThermoFisher)               | 25030-081             |                                                 |
|                                         | Hank’s Balanced Salt Solution            | Gibco (ThermoFisher)               | 14175–095             | Without Ca <sup>2+</sup> /Mg <sup>2+</sup>      |
|                                         | Dulbecco’s Phosphate Buffered Saline     | Sigma-Aldrich                      | D8537                 |                                                 |
|                                         | Penicillin-Streptomycin (10,000 U/mL)    | Gibco (ThermoFisher)               | 15140-122             |                                                 |
|                                         | RPMI 1640                                | Gibco (ThermoFisher)               | 11875–093             |                                                 |
| <b>Enzymes/inhibitors</b>               |                                          |                                    |                       |                                                 |
|                                         | Collagenase Type 4                       | Worthington Biochem (ThermoFisher) | LS004186              |                                                 |
|                                         | DNase I                                  | Sigma-Aldrich                      | DN25                  | Brain tissue dissociation                       |

|                           |                                                     |                                    |             |                                   |
|---------------------------|-----------------------------------------------------|------------------------------------|-------------|-----------------------------------|
|                           | cOmplete™ Protease Inhibitor Cocktail               | Roche Millipore-Sigma              | 11697498001 | Preparation of tissue homogenates |
| <b>Kits &amp; Assays</b>  | LDH Cytotoxicity Detection Kit                      | Sigma-Aldrich                      | 4744926001  | LDH assay                         |
|                           | Caspase-Glo 1 Inflammasome Assay Kit                | Promega                            | G9951       | Caspase-1 activity                |
|                           | High-Capacity cDNA Reverse Transcription Kit        | Applied Biosystems (Thermo-Fisher) | 4368814     | cDNA synthesis                    |
|                           | qPCRBIO Probe Blue Mix Lo-ROX - universal probe kit | Genesee                            | 17-514B     | qPCR                              |
| <b>ELISA Kits</b>         |                                                     |                                    |             |                                   |
|                           | IL-1β ELISA                                         | R&D Systems                        | DY401       |                                   |
|                           | TNF-α ELISA                                         | Invitrogen Thermo Fisher           | 88-7324-88  |                                   |
|                           | IL-6 ELISA                                          | Invitrogen Thermo/Fisher           | 88-7004-88  |                                   |
|                           | IL-18 ELISA                                         | Invitrogen ThermoFisher            | BMS618-3    |                                   |
|                           | IL-1ra/IL-1F13                                      | R&D Systems                        | MRA00       |                                   |
|                           | CXCL1/KC DuoSet                                     | R&D                                | DY453       |                                   |
|                           | Serum amyloid P ELISA                               | Immunology Consultants Laboratory  | E-90SAP     |                                   |
|                           | PGE <sub>2</sub>                                    | ENZO                               | ADI-901-001 |                                   |
| <b>Antibodies</b>         | Anti-CD11b (flow cytometry)                         | BioLegend                          | 101237      |                                   |
|                           | Anti-CD45 (flow cytometry)                          | BioLegend                          | 103107      |                                   |
|                           | Anti-CD16/32 Fc block                               | BioLegend                          | 101302      | Fc receptor blocking              |
| <b>Plastics / Labware</b> | White 96-well assay plates                          | Falcon                             | 353596      | Luminescence assays               |
| <b>Equipment</b>          | BioTek Synergy 2 Plate Reader                       | BioTek                             |             | Luminescence                      |
|                           | FastPrep-24 126-48 instrument                       | MP Biomedicals                     | 116004500   | Homogenization                    |
|                           | Attune NxT Flow Cytometer                           | Thermo Fisher                      |             | Flow cytometry                    |
|                           | QuantStudio 6 Flex qPCR system                      | Applied Biosystems                 |             | qPCR                              |
|                           | Physitemp rectal probe                              | Physitemp Instruments              |             | Temperature measurement           |
|                           | gentleMACS dissociator                              | Miltenyi Biotec                    |             | Dissociation of soft tissues      |
| <b>Software</b>           |                                                     |                                    |             |                                   |
|                           | GraphPad Prism                                      | GraphPad Software                  | v10.6.1     | Statistics                        |
|                           | Attune NxT Software                                 | Thermo Fisher                      |             | Flow cytometry acquisition        |
|                           | FlowJo                                              | FlowJo LLC Ashland, Oregon         | v10.6.1     | Cytometry analysis                |

| <b>Gene expression assays</b>                            |              |               |
|----------------------------------------------------------|--------------|---------------|
| TaqMan™ Gene Expression Assay (FAM), Mouse <i>Il6</i>    | ThermoFisher | Mm00446190_m1 |
| TaqMan™ Gene Expression Assay (FAM), Human <i>NLRP3</i>  | ThermoFisher | Hs00918082_m1 |
| TaqMan™ Gene Expression Assay (FAM), Mouse <i>Chil3</i>  | ThermoFisher | Mm00657889_mH |
| TaqMan™ Gene Expression Assay (FAM), Mouse <i>Il1rn</i>  | ThermoFisher | Mm00446186_m1 |
| TaqMan™ Gene Expression Assay (FAM), Mouse <i>Tnf</i>    | ThermoFisher | Mm00443258_m1 |
| TaqMan™ Gene Expression Assay (FAM), Mouse <i>Gfap</i>   | ThermoFisher | Mm01253033_m1 |
| TaqMan™ Gene Expression Assay (FAM), Mouse <i>Il1b</i>   | ThermoFisher | Mm00434228_m1 |
| TaqMan™ Gene Expression Assay (FAM), Mouse <i>Saa1/2</i> | ThermoFisher | Mm04208126_mH |
| TaqMan™ Gene Expression Assay (FAM), Mouse <i>Mpo</i>    | ThermoFisher | Mm00447886_m1 |
| TaqMan™ Gene Expression Assay (FAM), Human 18s RNA       | ThermoFisher | H5999999-S1   |
